# Supplementary material for: Simultaneous analysis of 17O/16O, 18O/16O and 2H/1H of gypsum hydration water by cavity ring‐down laser spectroscopy
Source: PubMed Central journal article supplement (PMC5132057; doi:10.1002/rcm.7312), 2015-09-27
Supplement: RCM-29-1997-s001.pdf [file RCM-29-1997-s001.pdf]

## **Supplementary information**

### **Simultaneous analysis of $^{17}\text{O}/^{16}\text{O}$ , $^{18}\text{O}/^{16}\text{O}$ and $^2\text{H}/^1\text{H}$ of gypsum hydration water by cavity ringdown laser spectroscopy**

Fernando Gázquez<sup>1\*</sup>, Ian Mather<sup>1</sup>, James Rolfe<sup>1</sup>, Nicholas P. Evans<sup>1</sup>, Daniel Herwartz<sup>2</sup>,  
Michael Staubwasser<sup>2</sup> and David A. Hodell<sup>1</sup>

<sup>1</sup>Godwin Laboratory for Palaeoclimate Research. Department of Earth Sciences. University of Cambridge. Downing Street, Cambridge, Cambridgeshire, CB2 3EQ, United Kingdom

<sup>2</sup>Institute für Geology und Mineralogy. Universität zu Köln. Greinstrasse. 4-6, 50939, Köln, Germany

\*corresponding author (f.gazquez@ual.es)

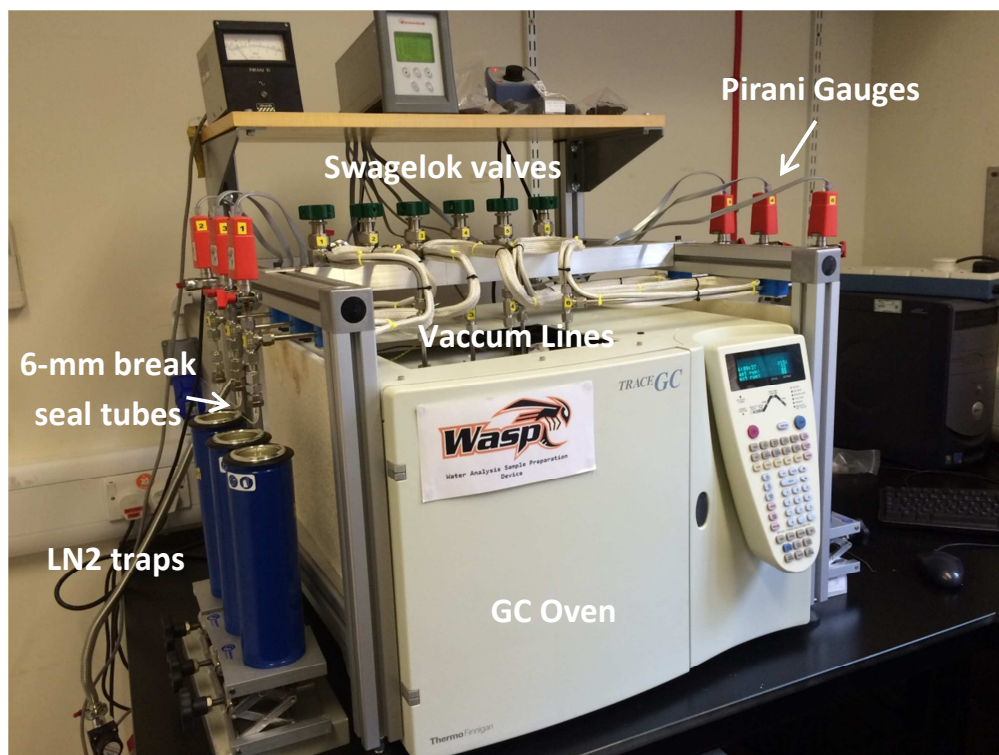

Figure S1. Frontal view of the Water Analyzer Sample Preparation (WASP) apparatus.

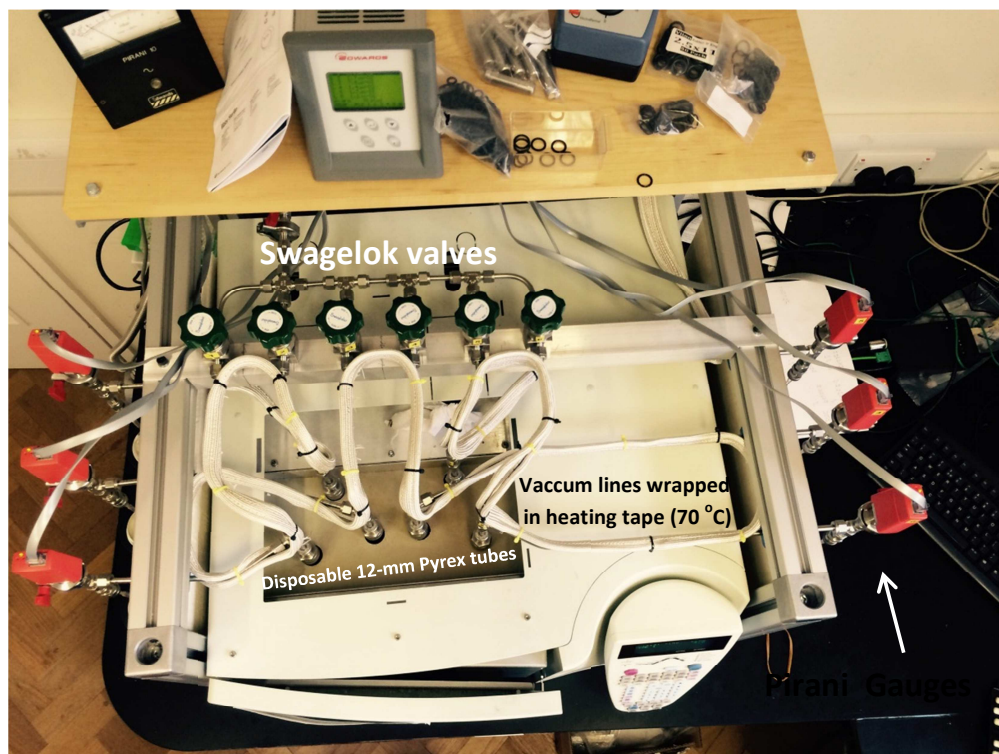

Figure S2. Bird's-eye view of the WASP apparatus.

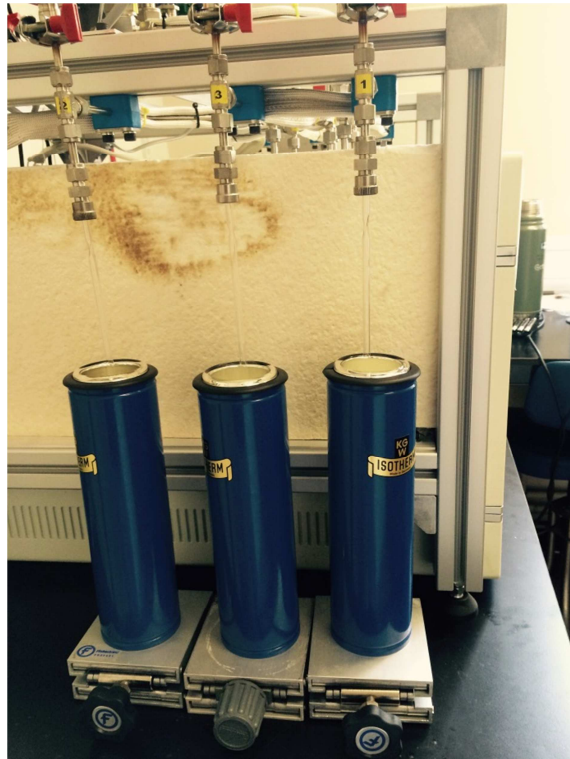

**Figure S3.** 6-mm break-seal tubes and LN2 traps.

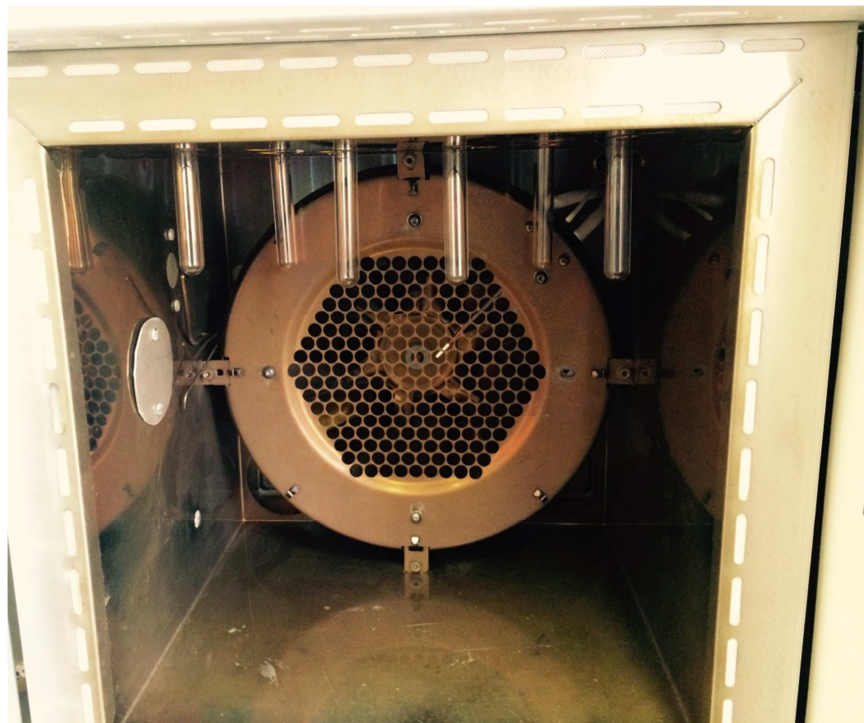

**Figure S4.** Internal view of the GC oven. Note the 6 disposable 12-mm Pyrex tubes for gypsum sample loading.

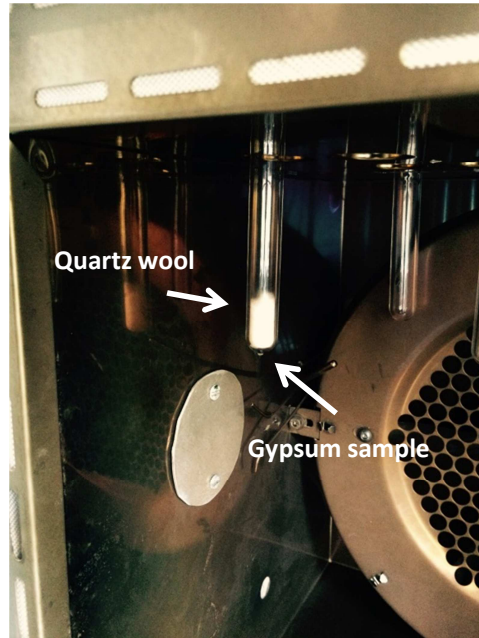

**Figure S5.** 12-mm Pyrex tubes loaded with a gypsum sample and topped with 3 cm of quartz wool before hydration water extraction.

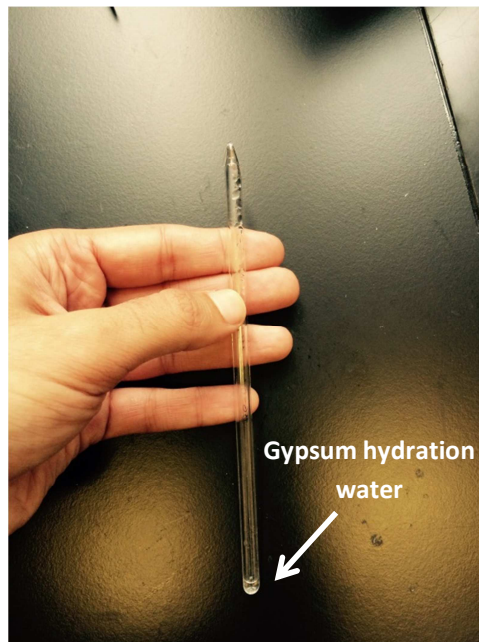

**Figure S6.** Gypsum hydration water recovered after a WASP run in a 6-mm break-seal tube.
